# Supplementary material for: Safety and immunogenicity of the Vi-DT typhoid conjugate vaccine in healthy volunteers in Nepal: an observer-blind, active-controlled, randomised, non-inferiority, phase 3 trial
Source: PubMed Central journal article supplement (PMC8942857; doi:10.1016/s1473-3099(21)00455-2), 2022-04
Supplement: mmc2.pdf [file mmc2.pdf]

# THE LANCET

## Infectious Diseases

### Supplementary appendix 2

This appendix formed part of the original submission and has been peer reviewed. We post it as supplied by the authors.

Supplement to: Rai GK, Saluja T, Chaudhary S, et al. Safety and immunogenicity of the Vi-DT typhoid conjugate vaccine in healthy volunteers in Nepal: an observer-blind, active-controlled, randomised, non-inferiority, phase 3 trial. *Lancet Infect Dis* 2021; published online Dec 20. [https://doi.org/10.1016/S1473-3099\(21\)00455-2](https://doi.org/10.1016/S1473-3099(21)00455-2).

## Supplementary Appendix

|                                                                                                                                 |         |
|---------------------------------------------------------------------------------------------------------------------------------|---------|
| <b>Supplementary Table S1:</b> Inclusion & Exclusion Criteria                                                                   | Page 3  |
| <b>Supplementary Table S2:</b> Schedule of Events                                                                               | Page 5  |
| <b>Supplementary Table S3:</b> Secondary outcomes                                                                               | Page 7  |
| <b>Supplementary Method:</b> In-house anti-Vi IgG ELISA                                                                         | Page 8  |
| <b>Supplementary Table S4:</b> Non-inferiority on Seroconversion of Anti-Vi IgG ELISA Response at Week 4 – PP set               | Page 9  |
| <b>Supplementary Table S5:</b> Lot to lot consistency on GMT of Anti-Vi IgG ELISA Response at Week 4 – PP set                   | Page 10 |
| <b>Supplementary Table S6:</b> Non-inferiority on GMT of Anti-Vi IgG ELISA response at week 4 – Immunogenicity set              | Page 11 |
| <b>Supplementary Figure S1:</b> Non-inferiority on GMT of Anti-Vi IgG ELISA response at week 4 – Immunogenicity set             | Page 12 |
| <b>Supplementary Table S7:</b> Non-inferiority on GMT of Anti-Vi IgG ELISA Response at Week 4 – PP set                          | Page 13 |
| <b>Supplementary Figure S2:</b> Failure rate (%) to seroconversion of Anti-Vi IgG ELISA response at week 4 – Immunogenicity set | Page 14 |
| <b>Supplementary Table S8:</b> Lot to lot consistency on Seroconversion of Anti-Vi IgG ELISA Response at Week 4 – PP set        | Page 15 |
| <b>Supplementary Table S9:</b> Non-interference between Vi-DT/Vi-TT and MR vaccine at Week 4 – Immunogenicity set               | Page 17 |
| <b>Supplementary Table S10:</b> Seroconversion rate of Anti-Vi IgG ELISA Response at Week 24 Weeks -Immunogenicity set          | Page 18 |
| <b>Supplementary Table S11:</b> Seroconversion rate of Anti-Vi IgG ELISA Response at Week 24 – PP set                           | Page 19 |
| <b>Supplementary Table S12:</b> GMT of Anti-Vi IgG ELISA Response at Week 24 Immunogenicity set                                 | Page 20 |
| <b>Supplementary Table S13:</b> GMT of Anti-Vi IgG ELISA Response at Week 24 – PP set                                           | Page 21 |

|                                                                                                  |         |
|--------------------------------------------------------------------------------------------------|---------|
| <b>Supplementary Table S14:</b> Summary of Adverse Events                                        | Page 22 |
| <b>Supplementary Table S16:</b> Distribution of immediate reactions                              | Page 24 |
| <b>Supplementary Table S17:</b> Distribution of solicited AEs                                    | Page 26 |
| <b>Supplementary Table S18:</b> Distribution of unsolicited AEs within 4 weeks after vaccination | Page 28 |
| <b>Supplementary Table S15:</b> Summary of Major Protocol Deviations                             | Page 31 |

**Supplementary Table S1: Inclusion & Exclusion Criteria**

|                                                                                                                                                                                                                                                                  |
|------------------------------------------------------------------------------------------------------------------------------------------------------------------------------------------------------------------------------------------------------------------|
| <b>Inclusion Criteria</b>                                                                                                                                                                                                                                        |
| Healthy participants 6 months to 45 years of age at enrolment,                                                                                                                                                                                                   |
| Healthy participants 9 to 15 months of age at enrolment (additional group only),                                                                                                                                                                                 |
| Participants/parents/LAR who have voluntarily given written informed consent/assent,                                                                                                                                                                             |
| Participants/parents/LAR willing to follow the study procedures of the study and available for the entire duration of the study.                                                                                                                                 |
| <b>Exclusion Criteria</b>                                                                                                                                                                                                                                        |
| Child with a congenital abnormality,                                                                                                                                                                                                                             |
| Subject concomitantly enrolled or scheduled to be enrolled in another trial,                                                                                                                                                                                     |
| Known history of immune function disorders including immunodeficiency diseases (Known HIV infection or other immune function disorders),                                                                                                                         |
| Chronic use of systemic steroids (>2 mg/kg/day or >20 mg/day prednisone equivalent for periods exceeding 10 days), cytotoxic or other immunosuppressive drugs,                                                                                                   |
| Receipt of blood or blood-derived products in the past 3 months,                                                                                                                                                                                                 |
| Subject with a previously ascertained or suspected disease caused by <i>S. Typhi</i> ,                                                                                                                                                                           |
| Subject who has had household contact with/and or intimate exposure to an individual with laboratory-confirmed <i>S. Typhi</i> ,                                                                                                                                 |
| Individual who has previously received a typhoid vaccine,                                                                                                                                                                                                        |
| Subject who has received or has been expected to receive other vaccines from 1 month prior to IP vaccination to Visit 4 (approx. 1 month post-IP) except PCV booster as per EPI schedule or any vaccine during National Immunization catch-up campaign of Nepal, |
| Known history or allergy to vaccines or other medications,                                                                                                                                                                                                       |
| History of uncontrolled coagulopathy or blood disorders,                                                                                                                                                                                                         |

Any abnormality or chronic disease which in the opinion of the investigator might be detrimental for the safety of the subject and interfere with the assessment of the study objectives,

Any female participant who is lactating, pregnant or planning for pregnancy during the study period\*,

Participants/parents/LAR planning to move from the study area before the end of study period,

As per Investigator's medical judgement, despite meeting all inclusion/exclusion criteria mentioned above.

**Temporary Contra-indication**

Acute illness, in particular infectious disease, or fever (axillary temperature  $\geq 37.5^{\circ}\text{C}$ ), within three days prior to enrollment and vaccination. These individuals could be rescreened upon resolution of the above said conditions.

\*Urine pregnancy test (UPT) was performed in all married females prior to vaccine administration.

**Supplementary Table S2: Schedule of Events**

| Visit Number                                 | V1      | V2      | V3     | V4     | V5  | V6     |
|----------------------------------------------|---------|---------|--------|--------|-----|--------|
| Visit Day                                    | D-7 - 0 | D0      | D7     | D28    | D84 | D168   |
| Visit Week                                   | -1      | 0       | 1      | 4      | 12  | 24     |
| Visit Window <sup>#</sup>                    |         | +1D     | ±1D    | ±3D    | ±7D | ±7D    |
| Informed Consent / assent                    | X       |         |        |        |     |        |
| Screening                                    | X       |         |        |        |     |        |
| Eligibility Criteria                         | X       |         |        |        |     |        |
| Informed Consent / assent                    | X       |         |        |        |     |        |
| Inclusion & Exclusion Criteria               | X       | X       |        |        |     |        |
| Medical History                              | X       | X       |        |        |     |        |
| Vital Signs                                  | X       | X       | X      | X      | X   | X      |
| Physical Examination                         | X       | X       | X      | X      | X   | X      |
| Enrollment & Randomization                   |         | X       |        |        |     |        |
| Vi-DT or Typbar TCV <sup>®</sup> Vaccination |         | X       |        |        |     |        |
| Post Vaccination 30 min F/U                  |         | X       |        |        |     |        |
| Solicited AE                                 |         | X       | X      |        |     |        |
| Unsolicited AE                               |         | X       | X      | X      |     |        |
| SAE                                          |         | X       | X      | X      | X   | X      |
| Diary Card Provided                          |         | X (DC1) | X(DC2) | X(DC3) |     |        |
| Diary Card Collected                         |         |         | X(DC1) | X(DC2) |     | X(DC3) |
| Concomitant Medications                      | X       | X       | X      | X      | X*  | X*     |

|                                                                      |  |             |  |              |  |              |
|----------------------------------------------------------------------|--|-------------|--|--------------|--|--------------|
| <b>For &lt; 2years<br/>Immunogenicity Blood<br/>Volume (approx.)</b> |  | <b>3mL</b>  |  | <b>3mL</b>   |  | <b>3mL</b>   |
| <b>For &lt; 2years<br/>Cumulative Blood<br/>Volume<br/>(approx.)</b> |  | <b>3 mL</b> |  | <b>6 mL</b>  |  | <b>9 mL</b>  |
| <b>For ≥ 2years<br/>Immunogenicity Blood<br/>Volume (approx.)</b>    |  | <b>5mL</b>  |  | <b>5mL</b>   |  | <b>5mL</b>   |
| <b>For ≥ 2years<br/>Cumulative Blood<br/>Volume(approx.)</b>         |  | <b>5 mL</b> |  | <b>10 mL</b> |  | <b>15 mL</b> |

### Supplementary Table S3: Secondary Endpoint/s Comparisons

- Geometric Mean Titers (GMT) of anti-Vi IgG at D28 (4 weeks post vaccination) of Vi-DT (Groups A+B+C) is non-inferior to Typbar TCV® (Group D) using non-inferiority margin of GMT ratio > 0.67,
- Anti-Vi IgG seroconversion rate at D28 post each lot of Vi-DT vaccine is equivalent to each other (A vs. B, B vs. C, and C vs. A) using equivalence margin of difference of [-10%, 10%],
- Sero-positive rate of IgG antibody titers for Measles (M), Mumps (M) and Rubella (R) following single dose of MMR at 4 weeks in participants who received MMR + Vi-DT is non-inferior to sero-positive rate in participants who received MMR alone with non-inferiority margin of -10% (additional group only),

The following secondary endpoints to be described by vaccine groups as well as by age strata:

- Geometric Mean Titers (GMT) of anti-Vi IgG at D168 (24 weeks post vaccination) of Vi-DT (Groups A+B+C) and Typbar TCV® (Group D),
- Anti-Vi IgG seroconversion rate at D168 post Vi-DT vaccination (25 µg) (Groups A+B+C) and Typbar TCV® (Group D),
- Anti-Vi IgG seroconversion rate and GMT at 4 weeks (day 28) post Vi-DT vaccine (25 µg) (pooled Groups A+B+C) and Typbar TCV® (Group D) in participants who received concomitantly MR vaccine,
- Anti-Vi IgG seroconversion rate and GMT at 4 weeks (day 28) post Vi-DT vaccine (25 µg) (pooled Groups A+B+C) in participants 9-15 months who concomitantly received and did not receive MR vaccine,
- Sero-positive rate of IgG antibody titers for Measles (M) and Rubella (R) at 4 weeks (day 28) post vaccination of Vi-DT (Groups A+B+C combined) and Typbar TCV® (Group D) in participants who received concomitant MR vaccine,
- Frequency of local and systemic solicited adverse events during the 7 days after vaccination
  - Solicited local reactions at the site of injection: Pain/ tenderness, erythema/redness, swelling/ induration, pruritus pruritus associated with injection
  - Solicited Systemic reactions (adapted to each age group): Fever, headache, fatigue, myalgia, lethargy, irritability, nausea, vomiting, arthralgia, diarrhea, drowsiness, loss of appetite, chills, rash, nasopharyngitis and persistent crying
- Frequency of unsolicited adverse events during 4 weeks after vaccination
- Frequency of Serious Adverse Events during the entire study period



### **Supplementary Method: In-house anti-Vi IgG ELISA**

The assay was used to assess anti-Vi IgG antibodies in human sera. Briefly, 96-well plates (Nunc-Immunoplates, Maxisorp™, USA) were precoated with 10 µg/ml poly-L-lysine (Sigma-Aldrich, USA) for 2h. After washing the plates, 2 µg/ml Vi antigen (SK Bioscience, South Korea) was coated overnight at 37°C. The plates were blocked with 1% bovine serum albumin in PBS for 1h and then, diluted human sera and reference serum were added to the plates accordingly and 2-fold serially diluted. After incubation of the plates for 1 h at 37°C and washing, alkaline phosphatase (AP)-conjugated mouse anti-human IgG (Abcam, UK) was added and incubated for 1 h. After washing, 4-nitrophenyl phosphate substrate (Sigma-Aldrich) was added for 1 h. The plate was read at 405 nm and corrected at 490 nm. Anti-Vi IgG titer was determined as international unit per ml based on NIBSC international standard serum (NIBSC 16/138).

**Supplementary Table S4:** Non-inferiority on Seroconversion of Anti-Vi IgG ELISA Response at Week 4 – PP set

| Week 4 Post Vaccination | Vi-DT Group<br>(Pooled Groups A+B+C) |                                  | Vi-TT Group |                                 | Vi-DT - Vi-TT             | P-value‡ |
|-------------------------|--------------------------------------|----------------------------------|-------------|---------------------------------|---------------------------|----------|
|                         | n/N                                  | Seroconversion rate * (97.5% CI) | n/N         | Seroconversion rate* (97.5% CI) | Difference<br>(97.5% CI)† |          |
| <b>All Ages</b>         | 1316/1325                            | 99.32 (98.60, 99.67)             | 437/442     | 98.87 (97.07, 99.57)            | 0.47 (-0.69, 1.62)        | 0.3633   |
| <b>Age Strata1</b>      | 424/429                              | 98.83 (97.30, 99.50)             | 144/146     | 98.63 (95.14, 99.62)            | 0.20 (-2.83, 3.24)        | 1.0000   |
| <b>Age Strata2</b>      | 447/448                              | 99.78 (98.75, 99.96)             | 147/148     | 99.32 (96.27, 99.88)            | 0.45 (-2.42, 3.32)        | 0.4353   |
| <b>Age Strata3</b>      | 445/448                              | 99.33 (98.05, 99.77)             | 146/148     | 98.65 (95.21, 99.63)            | 0.68 (-2.28, 3.65)        | 0.6023   |

[Note] N: number of total participants; n: number of participants seroconverted.

\* Proportion of participants who had at least 4-fold rise anti-Vi antibody titers compared to baseline.

† The non-inferiority of Vi-DT was confirmed as the lower limit of two tailed 95% confidence interval of the difference of seroconversion rate of Vi-DT and Typbar TCV was greater than the non-inferiority margin of -10%.

‡ The p-value was derived from Fisher's exact test.

**Supplementary Table S5: Lot to lot consistency on GMT of Anti-Vi IgG ELISA Response at Week 4 – PP set**

| All Ages       | Comparison Group1 |                         | Comparison Group 2 |                         | Group 1 / Group 2    | P-value‡ |
|----------------|-------------------|-------------------------|--------------------|-------------------------|----------------------|----------|
|                | N                 | GMT* (99.17% CI)        | N                  | GMT* (99.17% CI)        | Ratio (99.17% CI) †  |          |
| Lot 1 vs Lot 2 | 441               | 453.22 (397.90, 516.23) | 445                | 445.42 (391.51, 506.74) | 1.018 (0.849, 1.221) | 0.7951   |
| Lot 1 vs Lot 3 | 441               | 453.22 (397.90, 516.23) | 439                | 445.20 (390.70, 507.31) | 1.017 (0.847, 1.222) | 0.8032   |
| Lot 2 vs Lot 3 | 445               | 445.42 (391.51, 506.74) | 439                | 445.20 (390.70, 507.31) | 1.000 (0.833, 1.200) | 0.9961   |
| Age Strata1    | Comparison Group1 |                         | Comparison Group 2 |                         | Group 1 / Group 2    | P-value‡ |
|                | N                 | GMT* (95% CI)           | N                  | GMT* (95% CI)           | Ratio (95% CI)†      |          |
| Lot 1 vs Lot 2 | 143               | 552.44 (482.77, 632.16) | 145                | 538.36 (482.28, 600.97) | 1.03 (0.86, 1.22)    | 0.7696   |
| Lot 1 vs Lot 3 | 143               | 552.44 (482.77, 632.16) | 141                | 466.96 (400.28, 544.75) | 1.18 (0.97, 1.45)    | 0.1057   |
| Lot 2 vs Lot 3 | 145               | 538.36 (482.28, 600.97) | 141                | 466.96 (400.28, 544.75) | 1.15 (0.95, 1.39)    | 0.1386   |
| Age Strata2    | Comparison Group1 |                         | Comparison Group 2 |                         | Group 1 / Group 2    | P-value‡ |
|                | N                 | GMT* (95% CI)           | N                  | GMT* (95% CI)           | Ratio (95% CI)†      |          |
| Lot 1 vs Lot 2 | 149               | 410.48 (352.60, 477.87) | 150                | 402.84 (350.68, 462.77) | 1.02 (0.83, 1.25)    | 0.8570   |
| Lot 1 vs Lot 3 | 149               | 410.48 (352.60, 477.87) | 149                | 445.14 (380.55, 520.70) | 0.92 (0.74, 1.15)    | 0.4638   |
| Lot 2 vs Lot 3 | 150               | 402.84 (350.68, 462.77) | 149                | 445.14 (380.55, 520.70) | 0.90 (0.73, 1.11)    | 0.3467   |
| Age Strata3    | Comparison Group1 |                         | Comparison Group 2 |                         | Group 1 / Group 2    | P-value‡ |
|                | N                 | GMT* (95% CI)           | N                  | GMT* (95% CI)           | Ratio (95% CI)†      |          |
| Lot 1 vs Lot 2 | 149               | 413.82 (337.54, 507.34) | 150                | 410.05 (328.03, 512.57) | 1.01 (0.75, 1.36)    | 0.9522   |
| Lot 1 vs Lot 3 | 149               | 413.82 (337.54, 507.34) | 149                | 425.60 (351.43, 515.43) | 0.97 (0.74, 1.28)    | 0.8429   |
| Lot 2 vs Lot 3 | 150               | 410.05 (328.03, 512.57) | 149                | 425.60 (351.43, 515.43) | 0.96 (0.72, 1.29)    | 0.8026   |

[Note] N: number of total participants; \* Geometric Mean Titers (unit: IU/ml)

† The equivalence of two lots was confirmed as the both limits of two-tailed 95% confidence interval of the fold difference of GMT between two lots of Vi-DT was within the equivalence margin of [0.67, 1.5].

‡ The p-value was derived from two sample t-test.

**Supplementary Table S6:** Non-inferiority on GMT of Anti-Vi IgG ELISA response at week 4 – Immunogenicity set

| Week 4 Post Vaccination | Vi-DT Group<br>(Pooled Groups A+B+C) |                         | Vi-TT Group |                         | Vi-DT Group / Vi-TT Group |  |
|-------------------------|--------------------------------------|-------------------------|-------------|-------------------------|---------------------------|--|
|                         | N                                    | GMT* (95% CI)           | N           | GMT* (95% CI)           | Ratio (95% CI) †          |  |
| <b>All Ages</b>         | 1340                                 | 444.98 (421.12, 470.20) | 446         | 381.19 (348.23, 417.27) | 1.169 (1.049, 1.302)      |  |
| <b>Age Strata1</b>      | 443                                  | 505.39 (468.07, 545.68) | 150         | 421.74 (354.69, 501.45) | 1.20 (0.99, 1.45)         |  |
| <b>Age Strata2</b>      | 448                                  | 419.06 (384.66, 456.52) | 148         | 450.74 (396.56, 512.33) | 0.93 (0.80, 1.08)         |  |
| <b>Age Strata3</b>      | 449                                  | 416.70 (370.27, 468.94) | 148         | 290.98 (248.21, 341.11) | 1.43 (1.18, 1.74)         |  |

\* Geometric Mean Titers (unit: IU/ml)

† The non-inferiority of Vi-DT will be confirmed if the lower limit of two-tailed 95% confidence interval of the ratio of GMT of Vi-DT to Vi-TT is greater than the non-inferiority margin of 0.67.

Supplementary Figure S1: Box-whisker plot of Anti-Vi IgG ELISA response at week 4 – Immunogenicity set

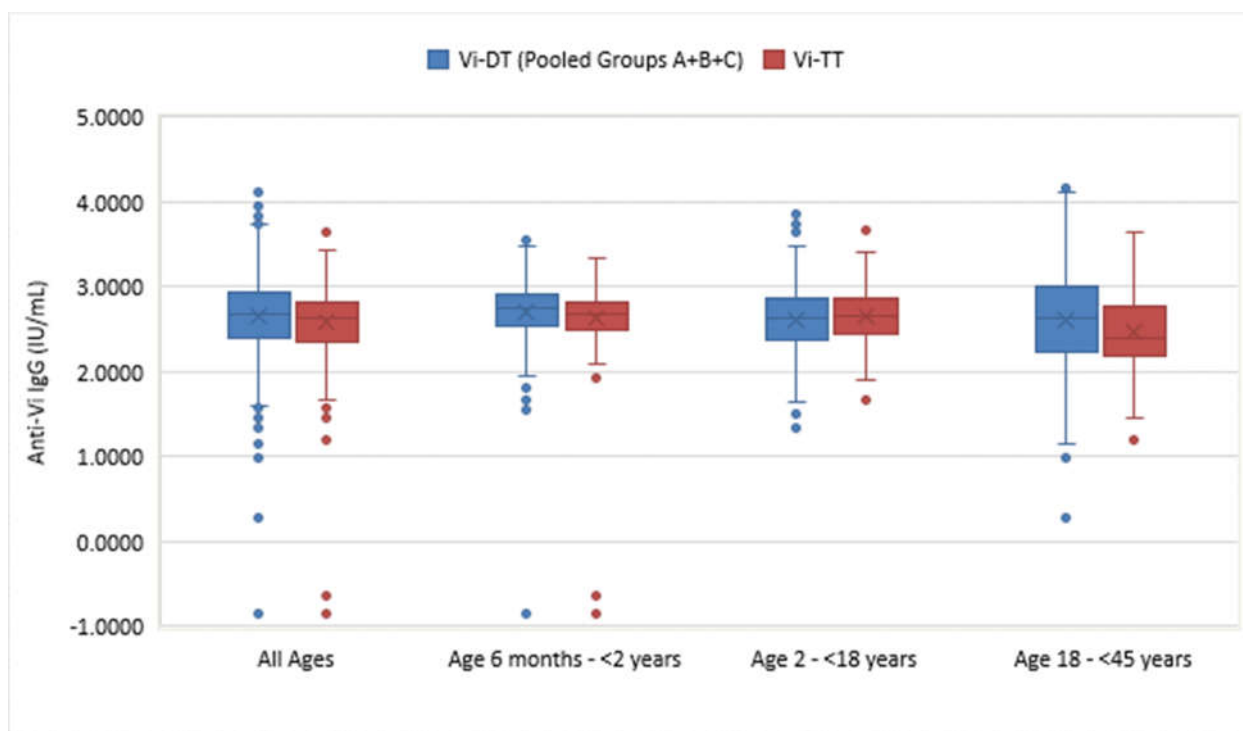

**Supplementary Table S7:** Non-inferiority on GMT of Anti-Vi IgG ELISA Response at Week 4 – PP set

| Week 4 Post Vaccination | Vi-DT Group<br>(Pooled Groups A+B+C) |                         | Vi-TT Group |                         | Vi-DT Group / Vi-TT Group | P-value‡ |
|-------------------------|--------------------------------------|-------------------------|-------------|-------------------------|---------------------------|----------|
|                         | N                                    | GMT* (95% CI)           | N           | GMT* (95% CI)           | Ratio (95% CI) †          |          |
| <b>All Ages</b>         | 1325                                 | 447.93 (423.76, 473.47) | 442         | 384.22 (350.85, 420.76) | 1.167 (1.047, 1.302)      | 0.0053   |
| <b>Age Strata1</b>      | 429                                  | 518.20 (479.83, 559.65) | 146         | 433.16 (363.39, 516.32) | 1.20 (0.99, 1.45)         | 0.0663   |
| <b>Age Strata2</b>      | 448                                  | 419.06 (384.66, 456.52) | 148         | 450.74 (396.56, 512.33) | 0.93 (0.80, 1.08)         | 0.3514   |
| <b>Age Strata3</b>      | 448                                  | 416.42 (369.93, 468.76) | 148         | 290.98 (248.21, 341.11) | 1.43 (1.17, 1.74)         | 0.0004   |

\* Geometric Mean Titers (unit: IU/ml)

† The non-inferiority of Vi-DT was confirmed as the lower limit of two-tailed 95% confidence interval of the ratio of GMT of Vi-DT to Vi-TT was greater than the non-inferiority margin of 0.67.

‡ The p-value was derived from two sample t-test.

**Supplementary Figure S2:** Failure rate (%) to seroconversion of Anti-Vi IgG ELISA response at week 4 – Immunogenicity set

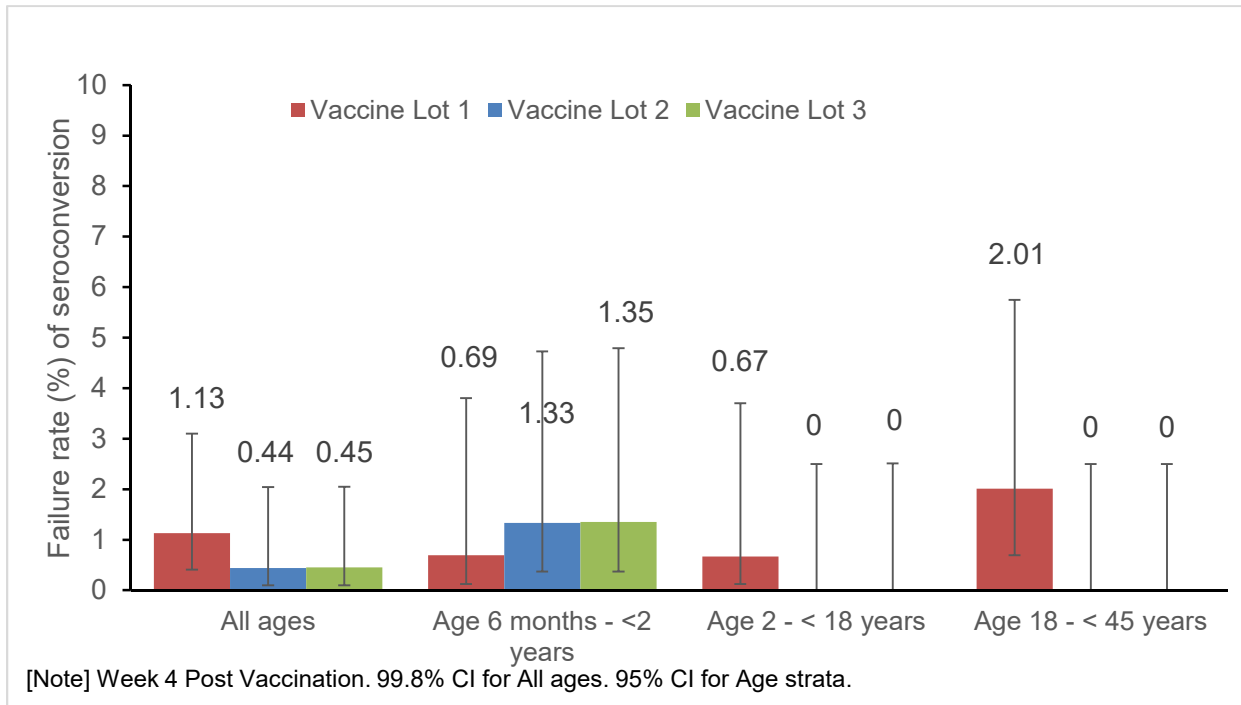

**Supplementary Table S8:** Lot to lot consistency on Seroconversion of Anti-Vi IgG ELISA Response at Week 4 – PP set

| All Ages       | Comparison Group 1 |                                  | Comparison Group 2 |                                  | Group 1 - Group 2       | P-value‡ |
|----------------|--------------------|----------------------------------|--------------------|----------------------------------|-------------------------|----------|
|                | n/N                | Seroconversion rate* (98.33% CI) | n/N                | Seroconversion rate* (98.33% CI) | Difference (98.33% CI)† |          |
| Lot 1 vs Lot 2 | 436/441            | 98.87 (96.89, 99.59)             | 443/445            | 99.55 (97.94, 99.90)             | -0.68 (-2.11, 0.74)     | 0.2501   |
| Lot 1 vs Lot 3 | 436/441            | 98.87 (96.89, 99.59)             | 437/439            | 99.54 (97.91, 99.90)             | -0.68 (-2.11, 0.76)     | 0.2589   |
| Lot 2 vs Lot 3 | 443/445            | 99.55 (97.94, 99.90)             | 437/439            | 99.54 (97.91, 99.90)             | 0.01 (-1.07, 1.10)      | 0.9775   |
| Age Strata1    | Comparison Group 1 |                                  | Comparison Group 2 |                                  | Group 1 - Group 2       | P-value‡ |
|                | n/N                | Seroconversion rate* (95% CI)    | n/N                | Seroconversion rate* (95% CI)    | Difference (95% CI)†    |          |
| Lot 1 vs Lot 2 | 142/143            | 99.30 (96.15, 99.88)             | 143/145            | 98.62 (95.11, 99.62)             | 0.68 (-4.56, 5.92)      | 1.0000   |
| Lot 1 vs Lot 3 | 142/143            | 99.30 (96.15, 99.88)             | 139/141            | 98.58 (94.98, 99.61)             | 0.72 (-4.53, 5.96)      | 0.6210   |
| Lot 2 vs Lot 3 | 143/145            | 98.62 (95.11, 99.62)             | 139/141            | 98.58 (94.98, 99.61)             | 0.04 (-5.25, 5.32)      | 1.0000   |
| Age Strata2    | Comparison Group 1 |                                  | Comparison Group 2 |                                  | Group 1 - Group 2       | P-value‡ |
|                | n/N                | Seroconversion rate* (95% CI)    | n/N                | Seroconversion rate* (95% CI)    | Difference (95% CI)†    |          |
| Lot 1 vs Lot 2 | 148/149            | 99.33 (96.30, 99.88)             | 150/150            | 100.00 (97.50, 100.00)           | -0.67 (-5.62, 4.28)     | 0.4983   |
| Lot 1 vs Lot 3 | 148/149            | 99.33 (96.30, 99.88)             | 149/149            | 100.00 (97.49, 100.00)           | -0.67 (-5.64, 4.30)     | 1.0000   |
| Lot 2 vs Lot 3 | 150/150            | 100.00 (97.50, 100.00)           | 149/149            | 100.00 (97.49, 100.00)           | 0.00 (0.00, 0.00)       | NA       |
| Age Strata     | Comparison Group 1 |                                  | Comparison Group 2 |                                  | Group 1 - Group 2       | P-value‡ |
|                | n/N                | Seroconversion rate* (95% CI)    | n/N                | Seroconversion rate* (95% CI)    | Difference (95% CI)†    |          |
| Lot 1 vs Lot 2 | 146/149            | 97.99 (94.25, 99.31)             | 150/150            | 100.00 (97.50, 100.00)           | -2.01 (-7.25, 3.22)     | 0.1225   |
| Lot 1 vs Lot 3 | 146/149            | 97.99 (94.25, 99.31)             | 149/149            | 100.00 (97.49, 100.00)           | -2.01 (-7.27, 3.24)     | 0.2475   |
| Lot 2 vs Lot 3 | 150/150            | 100.00 (97.50, 100.00)           | 149/149            | 100.00 (97.49, 100.00)           | 0.00 (0.00, 0.00)       | NA       |

[Note] N: number of total participants; n: number of participants seroconverted. NA: Not Applicable.

\* Proportion of participants who had at least 4-fold rise anti-Vi antibody titers compared to baseline.



† The equivalence of two lots will be confirmed if the both limits of two-tailed 95% confidence interval of the difference of seroconversion rate between two lots of Vi-DT is within the equivalence margin of [-10%, 10%].

‡ The p-value was derived from Fisher's exact test.

**Supplementary Table S9:** Non-interference between Vi-DT/Vi-TT and MR vaccine at Week 4 – Immunogenicity set

| 9-15 months old                     | Vi-DT + MR Group<br>(Pooled Groups A+B+C) (N=77) |                         | Vi-TT + MR Group<br>(N=30) |                         | P-value‡ |
|-------------------------------------|--------------------------------------------------|-------------------------|----------------------------|-------------------------|----------|
|                                     | n                                                | Estimate (95% CI)       | n                          | Estimate (95% CI)       |          |
| <b>Anti-Vi Seroconversion rate*</b> | 77                                               | 100.00 (95.25, 100.00)  | 30                         | 100.00 (88.65, 100.00)  | NA       |
| <b>Anti-Vi GMT†</b>                 | -                                                | 501.50 (423.11, 594.41) | -                          | 464.38 (366.80, 587.92) | 0.5939   |

[Note] N: number of total participants; n: number of participants seroconverted. NA: Not Applicable.

\* Proportion of participants who had at least 4-fold rise anti-Vi antibody titers compared to baseline

† Anti Vi IgG Geometric Mean Titers (unit: IU/ml)

‡ The p-value for GMT comparison was derived from two sample t-test.

**Supplementary Table S10:** Seroconversion rate of Anti-Vi IgG ELISA Response at Week 24 Weeks - Immunogenicity set

| Week 24 Post Vaccination | Vi-DT Group<br>(Pooled Groups A+B+C) |                               | Vi-TT Group |                               | P-value <sup>†</sup> |
|--------------------------|--------------------------------------|-------------------------------|-------------|-------------------------------|----------------------|
|                          | n/N                                  | Seroconversion rate* (95% CI) | n/N         | Seroconversion rate* (95% CI) |                      |
| All Ages                 | 1213/1231                            | 98.54 (97.70, 99.07)          | 391/402     | 97.26 (95.17, 98.47)          | 0.2338               |
| Age Strata1              | 367/372                              | 98.66 (96.89, 99.42)          | 126/126     | 100.00 (97.04, 100.00)        | 0.3366               |
| Age Strata2              | 435/438                              | 99.32 (98.01, 99.77)          | 140/144     | 97.22 (93.08, 98.91)          | 0.0670               |
| Age Strata3              | 411/421                              | 97.62 (95.68, 98.70)          | 125/132     | 94.70 (89.46, 97.41)          | 0.1425               |

[Note] N: number of total participants; n: number of participants seroconverted.

\* Proportion of participants who had at least 4-fold rise of anti-Vi IgG antibody titers compared to baseline.

† The p-value for all ages was derived using the generalized linear model for binomial distribution with group and strata as covariates. The p-value for each age strata was derived from Fisher's exact test.

**Supplementary Table S11:** Seroconversion rate of Anti-Vi IgG ELISA Response at Week 24 – PP set

| Week 24 Post Vaccination | Vi-DT Group<br>(Pooled Groups A+B+C) |                               | Vi-TT Group |                               | P-value† |
|--------------------------|--------------------------------------|-------------------------------|-------------|-------------------------------|----------|
|                          | n/N                                  | Seroconversion rate* (95% CI) | n/N         | Seroconversion rate* (95% CI) |          |
| All Ages                 | 1136/1152                            | 98.61 (97.76, 99.14)          | 370/380     | 97.37 (95.22, 98.56)          | 0.3132   |
| Age Strata1              | 345/350                              | 98.57 (96.70, 99.39)          | 119/119     | 100.00 (96.87, 100.00)        | 0.3361   |
| Age Strata2              | 407/410                              | 99.27 (97.87, 99.75)          | 133/136     | 97.79 (93.72, 99.25)          | 0.1669   |
| Age Strata3              | 384/392                              | 97.96 (96.03, 98.96)          | 118/125     | 94.40 (88.89, 97.26)          | 0.0603   |

[Note] N: number of total participants; n: number of participants seroconverted.

\* Proportion of participants who had at least 4-fold rise of anti-Vi IgG antibody titers compared to baseline.

† The p-value for all ages was derived using the generalized linear model for binomial distribution with group and strata as covariates. The p-value for each age strata was derived from Fisher's exact test

**Supplementary Table S12: GMT of Anti-Vi IgG ELISA Response at Week 24 Immunogenicity set**

| Week 24 Post Vaccination | Vi-DT Group<br>(Pooled Groups A+B+C) |                         | Vi-TT Group |                         | P-value† |
|--------------------------|--------------------------------------|-------------------------|-------------|-------------------------|----------|
|                          | N                                    | GMT* (95% CI)           | N           | GMT* (95% CI)           |          |
| All Ages                 | 1231                                 | 88.07 (83.04, 93.41)    | 402         | 99.31 (91.07, 108.29)   | 0.0168   |
| Age Strata1              | 372                                  | 50.17 (47.07, 53.48)    | 126         | 73.41 (65.52, 82.26)    | <0.0001  |
| Age Strata2              | 438                                  | 92.87 (85.01, 101.44)   | 144         | 110.03 (94.30, 128.39)  | 0.0609   |
| Age Strata3              | 421                                  | 137.03 (121.87, 154.07) | 132         | 118.47 (100.61, 139.51) | 0.1544   |

\* Geometric Mean Titers (unit: IU/ml)

† The p-value for all ages was derived using an analysis of covariance model with group and age strata as covariates after log transformation. The p-value for each age strata was derived from two sample t-test after log transformation.

**Supplementary Table S13: GMT of Anti-Vi IgG ELISA Response at Week 24 – PP set**

| Week 24 Post Vaccination | Vi-DT Group<br>(Pooled Groups A+B+C) |                         | Vi-TT Group |                         | P-value† |
|--------------------------|--------------------------------------|-------------------------|-------------|-------------------------|----------|
|                          | N                                    | GMT* (95% CI)           | N           | GMT* (95% CI)           |          |
| All Ages                 | 1152                                 | 90.28 (84.95, 95.94)    | 380         | 100.87 (92.40, 110.12)  | 0.0320   |
| Age Stratum 1            | 350                                  | 51.03 (47.81, 54.46)    | 119         | 75.09 (66.96, 84.21)    | <0.0001  |
| Age Stratum 2            | 410                                  | 94.80 (86.59, 103.78)   | 136         | 112.03 (96.11, 130.59)  | 0.0651   |
| Age Stratum 3            | 392                                  | 142.77 (126.42, 161.23) | 125         | 119.18 (100.59, 141.21) | 0.0887   |

\* Geometric Mean Titers (unit: IU/ml)

† The p-value for all ages was derived using an analysis of covariance model with group and age strata as covariates after log transformation. The p-value for each age strata was derived from two sample t-test after log transformation.

**Supplementary Table S14:** Summary of Adverse Events

| [All ages]<br>Entire study period (day 0 to day 28)          |                              | Vi-DT Group<br>(N=1350) |                     |               |                    |               |                    | Vi-TT Group<br>(N=450) |                    | P-value    |                     |                            |
|--------------------------------------------------------------|------------------------------|-------------------------|---------------------|---------------|--------------------|---------------|--------------------|------------------------|--------------------|------------|---------------------|----------------------------|
|                                                              |                              | Lot 1 (N=450)           |                     | Lot 2 (N=450) |                    | Lot 3 (N=450) |                    |                        |                    |            |                     |                            |
|                                                              |                              | m                       | n (%)               | m             | n (%)              | m             | n (%)              | m                      | n (%)              | m          | n (%)               |                            |
| <b>Immediate Reaction (for 30 minutes after vaccination)</b> |                              | <b>16</b>               | <b>16 (1.19%)</b>   | <b>3</b>      | <b>3 (0.67%)</b>   | <b>5</b>      | <b>5 (1.11%)</b>   | <b>8</b>               | <b>8 (1.78%)</b>   | <b>4</b>   | <b>4 (0.89%)</b>    | <b>0.6036[1] 0.4183[2]</b> |
| Severity:                                                    | Mild                         | 14                      | 14 (1.04%)          | 3             | 3 (0.67%)          | 4             | 4 (0.89%)          | 7                      | 7 (1.56%)          | 3          | 3 (0.67%)           | 0.5859[3] 0.5026[4]        |
|                                                              | Moderate                     | 2                       | 2 (0.15%)           | 0             | 0 (0.00%)          | 1             | 1 (0.22%)          | 1                      | 1 (0.22%)          | 1          | 1 (0.22%)           | 1.0000[3] 1.0000[4]        |
|                                                              | Severe                       | 0                       | 0 (0.00%)           | 0             | 0 (0.00%)          | 0             | 0 (0.00%)          | 0                      | 0 (0.00%)          | 0          | 0 (0.00%)           | NA                         |
|                                                              | Potentially life threatening | 0                       | 0 (0.00%)           | 0             | 0 (0.00%)          | 0             | 0 (0.00%)          | 0                      | 0 (0.00%)          | 0          | 0 (0.00%)           | NA                         |
| Relatedness:                                                 | Definitely Related           | 10                      | 10 (0.74%)          | 3             | 3 (0.67%)          | 2             | 2 (0.44%)          | 5                      | 5 (1.11%)          | 3          | 3 (0.67%)           | 1.0000[3] 0.7653[4]        |
|                                                              | Probably Related             | 3                       | 3 (0.22%)           | 0             | 0 (0.00%)          | 2             | 2 (0.44%)          | 1                      | 1 (0.22%)          | 0          | 0 (0.00%)           | 0.5777[3] 0.6244[4]        |
|                                                              | Possibly related             | 3                       | 3 (0.22%)           | 0             | 0 (0.00%)          | 1             | 1 (0.22%)          | 2                      | 2 (0.44%)          | 1          | 1 (0.22%)           | 1.0000[3] 0.9059[4]        |
|                                                              | Unlikely related             | 0                       | 0 (0.00%)           | 0             | 0 (0.00%)          | 0             | 0 (0.00%)          | 0                      | 0 (0.00%)          | 0          | 0 (0.00%)           | NA                         |
|                                                              | Not Related                  | 0                       | 0 (0.00%)           | 0             | 0 (0.00%)          | 0             | 0 (0.00%)          | 0                      | 0 (0.00%)          | 0          | 0 (0.00%)           | NA                         |
| <b>Solicited AE (during 7 days after vaccination)</b>        |                              | <b>453</b>              | <b>260 (19.26%)</b> | <b>137</b>    | <b>81 (18.00%)</b> | <b>141</b>    | <b>91 (20.22%)</b> | <b>175</b>             | <b>88 (19.56%)</b> | <b>191</b> | <b>115 (25.56%)</b> | <b>0.0044[1] 0.0318[2]</b> |
| Severity:                                                    | Mild                         | 386                     | 247 (18.30%)        | 118           | 75 (16.67%)        | 131           | 89 (19.78%)        | 137                    | 83 (18.44%)        | 166        | 107 (23.78%)        | 0.0113[1] 0.0502[2]        |
|                                                              | Moderate                     | 59                      | 34 (2.52%)          | 17            | 11 (2.44%)         | 8             | 7 (1.56%)          | 34                     | 16 (3.56%)         | 22         | 15 (3.33%)          | 0.3576[1] 0.2348[2]        |
|                                                              | Severe                       | 7                       | 5 (0.37%)           | 2             | 2 (0.44%)          | 1             | 1 (0.22%)          | 4                      | 2 (0.44%)          | 3          | 2 (0.44%)           | 1.0000[3] 1.0000[4]        |
|                                                              | Potentially life threatening | 1                       | 1 (0.07%)           | 0             | 0 (0.00%)          | 1             | 1 (0.22%)          | 0                      | 0 (0.00%)          | 0          | 0 (0.00%)           | 1.0000[3] 1.0000[4]        |
| Relatedness:                                                 | Definitely Related           | 190                     | 153 (11.33%)        | 50            | 44 (9.78%)         | 63            | 55 (12.22%)        | 77                     | 54 (12.00%)        | 90         | 79 (17.56%)         | 0.0006[1] 0.0044[2]        |
|                                                              | Probably Related             | 70                      | 50 (3.70%)          | 22            | 15 (3.33%)         | 23            | 17 (3.78%)         | 25                     | 18 (4.00%)         | 29         | 14 (3.11%)          | 0.5566[1] 0.8854[2]        |
|                                                              | Possibly related             | 166                     | 96 (7.11%)          | 53            | 33 (7.33%)         | 51            | 30 (6.67%)         | 62                     | 33 (7.33%)         | 66         | 36 (8.00%)          | 0.5310[1] 0.8990[2]        |
|                                                              | Unlikely related             | 21                      | 8 (0.59%)           | 8             | 4 (0.89%)          | 4             | 3 (0.67%)          | 9                      | 1 (0.22%)          | 5          | 2 (0.44%)           | 1.0000[3] 0.7179[4]        |
|                                                              | Not Related                  | 6                       | 4 (0.30%)           | 4             | 2 (0.44%)          | 0             | 0 (0.00%)          | 2                      | 2 (0.44%)          | 1          | 1 (0.22%)           | 1.0000[3] 0.7648[4]        |

| Unsolicited AE (during 4 weeks after vaccination) |                              | 361      | 208 (15.41%)     | 110      | 63 (14.00%)      | 135      | 74 (16.44%)      | 116      | 71 (15.78%)      | 143      | 76 (16.89%)      | 0.4553[1] 0.6506[2]        |
|---------------------------------------------------|------------------------------|----------|------------------|----------|------------------|----------|------------------|----------|------------------|----------|------------------|----------------------------|
| Severity:                                         | Mild                         | 300      | 183 (13.56%)     | 84       | 54 (12.00%)      | 117      | 68 (15.11%)      | 99       | 61 (13.56%)      | 121      | 70 (15.56%)      | 0.2904[1] 0.4041[2]        |
|                                                   | Moderate                     | 56       | 34 (2.52%)       | 21       | 11 (2.44%)       | 18       | 10 (2.22%)       | 17       | 13 (2.89%)       | 22       | 13 (2.89%)       | 0.6696[1] 0.8987[2]        |
|                                                   | Severe                       | 5        | 2 (0.15%)        | 5        | 2 (0.44%)        | 0        | 0 (0.00%)        | 0        | 0 (0.00%)        | 0        | 0 (0.00%)        | 1.0000[3] 0.2496[4]        |
|                                                   | Potentially life threatening | 0        | 0 (0.00%)        | 0        | 0 (0.00%)        | 0        | 0 (0.00%)        | 0        | 0 (0.00%)        | 0        | 0 (0.00%)        | NA                         |
| Relatedness:                                      | Definitely Related           | 0        | 0 (0.00%)        | 0        | 0 (0.00%)        | 0        | 0 (0.00%)        | 0        | 0 (0.00%)        | 0        | 0 (0.00%)        | NA                         |
|                                                   | Probably Related             | 0        | 0 (0.00%)        | 0        | 0 (0.00%)        | 0        | 0 (0.00%)        | 0        | 0 (0.00%)        | 0        | 0 (0.00%)        | NA                         |
|                                                   | Possibly related             | 0        | 0 (0.00%)        | 0        | 0 (0.00%)        | 0        | 0 (0.00%)        | 0        | 0 (0.00%)        | 0        | 0 (0.00%)        | NA                         |
|                                                   | Unlikely related             | 152      | 93 (6.89%)       | 44       | 28 (6.22%)       | 58       | 32 (7.11%)       | 50       | 33 (7.33%)       | 79       | 41 (9.11%)       | 0.1199[1] 0.4120[2]        |
|                                                   | Not Related                  | 209      | 116 (8.59%)      | 66       | 35 (7.78%)       | 77       | 43 (9.56%)       | 66       | 38 (8.44%)       | 64       | 37 (8.22%)       | 0.8072[1] 0.8030[2]        |
| <b>SAE</b>                                        |                              | <b>4</b> | <b>4 (0.30%)</b> | <b>2</b> | <b>2 (0.44%)</b> | <b>1</b> | <b>1 (0.22%)</b> | <b>1</b> | <b>1 (0.22%)</b> | <b>1</b> | <b>1 (0.22%)</b> | <b>1.0000[3] 1.0000[4]</b> |

[Note] N: number of total participants; n: number of participants who reported events; m: number of events; %: percentages (100\*n/N). NA: Not Applicable

The p-value was derived from [1] Chi-square test or [3] Fisher's exact test compared between Vi-DT (Pooled Lot1+Lot2\_Lot3) and Vi-TT.

The p-value was derived from [2] Chi-square test or [4] Fisher's exact test compared among Vi-DT Lot1, Lot2, Lot3, and Vi-TT.



**Supplementary Table S16:** Distribution of immediate reactions

| [All ages]<br>Immediate reactions | Vi-DT Group<br>(N=1350) |                      |               |                  |               |                  | Vi-TT Group<br>(N=450) |                  | P-value  |                  |                            |
|-----------------------------------|-------------------------|----------------------|---------------|------------------|---------------|------------------|------------------------|------------------|----------|------------------|----------------------------|
|                                   | Lot 1 (N=450)           |                      | Lot 2 (N=450) |                  | Lot 3 (N=450) |                  | m                      | n (%)            |          |                  |                            |
|                                   | m                       | n (%)                | m             | n (%)            | m             | n (%)            | m                      | n (%)            |          |                  |                            |
| <b>All ages</b>                   | <b>16</b>               | <b>16</b><br>(1.19%) | <b>3</b>      | <b>3</b> (0.67%) | <b>5</b>      | <b>5</b> (1.11%) | <b>8</b>               | <b>8</b> (1.78%) | <b>4</b> | <b>4</b> (0.89%) | <b>0.6036[1] 0.4183[2]</b> |
| <b>Local AE</b>                   | <b>14</b>               | <b>14</b><br>(1.04%) | <b>3</b>      | <b>3</b> (0.67%) | <b>4</b>      | <b>4</b> (0.89%) | <b>7</b>               | <b>7</b> (1.56%) | <b>4</b> | <b>4</b> (0.89%) | <b>1.0000[3] 0.6760[4]</b> |
| Pain/Tenderness                   | 11                      | 11<br>(0.81%)        | 2             | 2 (0.44%)        | 3             | 3 (0.67%)        | 6                      | 6 (1.33%)        | 3        | 3 (0.67%)        | 1.0000[3] 0.5802[4]        |
| Erythema/Redness                  | 0                       | 0 (0.00%)            | 0             | 0 (0.00%)        | 0             | 0 (0.00%)        | 0                      | 0 (0.00%)        | 1        | 1 (0.22%)        | 0.2500[3] 1.0000[4]        |
| Swelling/Induration               | 0                       | 0 (0.00%)            | 0             | 0 (0.00%)        | 0             | 0 (0.00%)        | 0                      | 0 (0.00%)        | 0        | 0 (0.00%)        | NA                         |
| Pruritus                          | 0                       | 0 (0.00%)            | 0             | 0 (0.00%)        | 0             | 0 (0.00%)        | 0                      | 0 (0.00%)        | 0        | 0 (0.00%)        | NA                         |
| Pain/Tenderness (MR) *            | 0                       | 0 (0.00%)            | 0             | 0 (0.00%)        | 0             | 0 (0.00%)        | 0                      | 0 (0.00%)        | 0        | 0 (0.00%)        | NA                         |
| Erythema/Redness (MR) *           | 3                       | 3 (3.85%)            | 1             | 1 (4.17%)        | 1             | 1 (3.57%)        | 1                      | 1 (3.85%)        | 0        | 0 (0.00%)        | 0.5587[3] 0.7026[4]        |
| Swelling/Induration (MR) *        | 0                       | 0 (0.00%)            | 0             | 0 (0.00%)        | 0             | 0 (0.00%)        | 0                      | 0 (0.00%)        | 0        | 0 (0.00%)        | NA                         |
| Pruritus (MR)                     | 0                       | 0 (0.00%)            | 0             | 0 (0.00%)        | 0             | 0 (0.00%)        | 0                      | 0 (0.00%)        | 0        | 0 (0.00%)        | NA                         |
| <b>Systemic AE</b>                | <b>2</b>                | <b>2</b> (0.15%)     | <b>0</b>      | <b>0</b> (0.00%) | <b>1</b>      | <b>1</b> (0.22%) | <b>1</b>               | <b>1</b> (0.22%) | <b>0</b> | <b>0</b> (0.00%) | <b>1.0000[3] 1.0000[4]</b> |
| Fever                             | 0                       | 0 (0.00%)            | 0             | 0 (0.00%)        | 0             | 0 (0.00%)        | 0                      | 0 (0.00%)        | 0        | 0 (0.00%)        | NA                         |
| Headache †                        | 1                       | 1 (0.11%)            | 0             | 0 (0.00%)        | 1             | 1 (0.33%)        | 0                      | 0 (0.00%)        | 0        | 0 (0.00%)        | 1.0000[3] 1.0000[4]        |
| Fatigue †                         | 0                       | 0 (0.00%)            | 0             | 0 (0.00%)        | 0             | 0 (0.00%)        | 0                      | 0 (0.00%)        | 0        | 0 (0.00%)        | NA                         |
| Myalgia †                         | 0                       | 0 (0.00%)            | 0             | 0 (0.00%)        | 0             | 0 (0.00%)        | 0                      | 0 (0.00%)        | 0        | 0 (0.00%)        | NA                         |
| Lethargy                          | 0                       | 0 (0.00%)            | 0             | 0 (0.00%)        | 0             | 0 (0.00%)        | 0                      | 0 (0.00%)        | 0        | 0 (0.00%)        | NA                         |
| Irritability ‡                    | 0                       | 0 (0.00%)            | 0             | 0 (0.00%)        | 0             | 0 (0.00%)        | 0                      | 0 (0.00%)        | 0        | 0 (0.00%)        | NA                         |
| Nausea                            | 0                       | 0 (0.00%)            | 0             | 0 (0.00%)        | 0             | 0 (0.00%)        | 0                      | 0 (0.00%)        | 0        | 0 (0.00%)        | NA                         |
| Vomiting                          | 1                       | 1 (0.07%)            | 0             | 0 (0.00%)        | 0             | 0 (0.00%)        | 1                      | 1 (0.22%)        | 0        | 0 (0.00%)        | 1.0000[3] 1.0000[4]        |
| Arthralgia                        | 0                       | 0 (0.00%)            | 0             | 0 (0.00%)        | 0             | 0 (0.00%)        | 0                      | 0 (0.00%)        | 0        | 0 (0.00%)        | NA                         |
| Diarrhea                          | 0                       | 0 (0.00%)            | 0             | 0 (0.00%)        | 0             | 0 (0.00%)        | 0                      | 0 (0.00%)        | 0        | 0 (0.00%)        | NA                         |
| Drowsiness                        | 0                       | 0 (0.00%)            | 0             | 0 (0.00%)        | 0             | 0 (0.00%)        | 0                      | 0 (0.00%)        | 0        | 0 (0.00%)        | NA                         |
| Loss of appetite                  | 0                       | 0 (0.00%)            | 0             | 0 (0.00%)        | 0             | 0 (0.00%)        | 0                      | 0 (0.00%)        | 0        | 0 (0.00%)        | NA                         |
| Chills                            | 0                       | 0 (0.00%)            | 0             | 0 (0.00%)        | 0             | 0 (0.00%)        | 0                      | 0 (0.00%)        | 0        | 0 (0.00%)        | NA                         |
| Persistent crying ‡               | 0                       | 0 (0.00%)            | 0             | 0 (0.00%)        | 0             | 0 (0.00%)        | 0                      | 0 (0.00%)        | 0        | 0 (0.00%)        | NA                         |
| Rash *                            | 0                       | 0 (0.00%)            | 0             | 0 (0.00%)        | 0             | 0 (0.00%)        | 0                      | 0 (0.00%)        | 0        | 0 (0.00%)        | NA                         |
| Nasopharyngitis *                 | 0                       | 0 (0.00%)            | 0             | 0 (0.00%)        | 0             | 0 (0.00%)        | 0                      | 0 (0.00%)        | 0        | 0 (0.00%)        | NA                         |

[Note] N: number of total participants; n: number of participants who reported events; m: number of events; %: percentages ( $100 \cdot n/N$ ). NA: Not Applicable.

\* Only for MR vaccine recipients among the 9-15 months old (Total (N=108) and each Lot 1 (N=24), Lot 2 (N=28), Lot 3 (N=26), and Control (N=30))

† Only for Age Strata 2 and 3 those who are 2 years old and above (Total (N=1200) and each Lot 1 (N=300), Lot 2 (N=300), Lot 3 (N=300), and Control (N=30))

‡ Only for Age Strata 1 those who are less than 2 years (Total (N=600) and each Lot 1 (N=150), Lot 2 (N=150), Lot 3 (N=150), and Control (N=150))

The p-value was derived from [1] Chi-square test or [3] Fisher's exact test compared between Vi-DT (Pooled Lot1+Lot2\_Lot3) and Vi-TT.

The p-value was derived from [2] Chi-square test or [4] Fisher's exact test compared among Vi-DT Lot1, Lot2, Lot3, and Vi-TT.

**Supplementary Table S17:** Distribution of solicited AEs

| Within 7 days after vaccination | Vi-DT Group (N=1350) |                     |               |                    |               |                    | Vi-TT Group (N=450) |                    |            |                     | P-value                    |
|---------------------------------|----------------------|---------------------|---------------|--------------------|---------------|--------------------|---------------------|--------------------|------------|---------------------|----------------------------|
|                                 | Lot 1 (N=450)        |                     | Lot 2 (N=450) |                    | Lot 3 (N=450) |                    |                     |                    |            |                     |                            |
|                                 | m                    | n (%)               | m             | n (%)              | m             | n (%)              | m                   | n (%)              |            |                     |                            |
| <b>All ages</b>                 | <b>453</b>           | <b>260 (19.26%)</b> | <b>137</b>    | <b>81 (18.00%)</b> | <b>141</b>    | <b>91 (20.22%)</b> | <b>175</b>          | <b>88 (19.56%)</b> | <b>191</b> | <b>115 (25.56%)</b> | <b>0.0044[1] 0.0318[2]</b> |
| <b>Local AE</b>                 | <b>193</b>           | <b>170 (12.59%)</b> | <b>58</b>     | <b>50 (11.11%)</b> | <b>72</b>     | <b>65 (14.44%)</b> | <b>63</b>           | <b>55 (12.22%)</b> | <b>94</b>  | <b>86 (19.11%)</b>  | <b>0.0006[1] 0.0031[2]</b> |
| Pain/Tenderness                 | 159                  | 158 (11.70%)        | 45            | 45 (10.00%)        | 60            | 60 (13.33%)        | 54                  | 53 (11.78%)        | 81         | 81 (18.00%)         | 0.0007[1] 0.0032[2]        |
| Erythema/Redness                | 11                   | 11 (0.81%)          | 6             | 6 (1.33%)          | 4             | 4 (0.89%)          | 1                   | 1 (0.22%)          | 6          | 6 (1.33%)           | 0.3963[3] 0.2187[4]        |
| Swelling/Induration             | 7                    | 7 (0.52%)           | 2             | 2 (0.44%)          | 3             | 3 (0.67%)          | 2                   | 2 (0.44%)          | 3          | 3 (0.67%)           | 0.7179[3] 1.0000[4]        |
| Pruritus                        | 9                    | 9 (0.67%)           | 4             | 4 (0.89%)          | 3             | 3 (0.67%)          | 2                   | 2 (0.44%)          | 2          | 2 (0.44%)           | 0.7411[3] 0.9111[4]        |
| Pain/Tenderness (MR) *          | 4                    | 4 (5.13%)           | 0             | 0 (0.00%)          | 1             | 1 (3.57%)          | 3                   | 3 (11.54%)         | 2          | 2 (6.67%)           | 0.6690[3] 0.4002[4]        |
| Erythema/Redness (MR) *         | 3                    | 3 (3.85%)           | 1             | 1 (4.17%)          | 1             | 1 (3.57%)          | 1                   | 1 (3.85%)          | 0          | 0 (0.00%)           | 0.5587[3] 0.7026[4]        |
| Swelling/Induration (MR) *      | 0                    | 0 (0.00%)           | 0             | 0 (0.00%)          | 0             | 0 (0.00%)          | 0                   | 0 (0.00%)          | 0          | 0 (0.00%)           | NA                         |
| Pruritus (MR)                   | 0                    | 0 (0.00%)           | 0             | 0 (0.00%)          | 0             | 0 (0.00%)          | 0                   | 0 (0.00%)          | 0          | 0 (0.00%)           | NA                         |
| <b>Systemic AE</b>              | <b>260</b>           | <b>140 (10.37%)</b> | <b>79</b>     | <b>44 (9.78%)</b>  | <b>69</b>     | <b>42 (9.33%)</b>  | <b>112</b>          | <b>54 (12.00%)</b> | <b>97</b>  | <b>49 (10.89%)</b>  | <b>0.7560[1] 0.5618[2]</b> |
| Fever                           | 49                   | 45 (3.33%)          | 10            | 9 (2.00%)          | 18            | 17 (3.78%)         | 21                  | 19 (4.22%)         | 21         | 18 (4.00%)          | 0.5051[1] 0.2479[2]        |
| Headache †                      | 37                   | 33 (3.67%)          | 9             | 9 (3.00%)          | 13            | 10 (3.33%)         | 15                  | 14 (4.67%)         | 13         | 11 (3.67%)          | 1.0000[1] 0.7241[2]        |
| Fatigue †                       | 10                   | 9 (1.00%)           | 4             | 4 (1.33%)          | 1             | 1 (0.33%)          | 5                   | 4 (1.33%)          | 5          | 4 (1.33%)           | 0.7471[3] 0.5372[4]        |
| Myalgia †                       | 6                    | 5 (0.56%)           | 2             | 2 (0.67%)          | 1             | 1 (0.33%)          | 3                   | 2 (0.67%)          | 1          | 1 (0.33%)           | 1.0000[3] 1.0000[4]        |
| Lethargy                        | 22                   | 21 (1.56%)          | 6             | 6 (1.33%)          | 4             | 4 (0.89%)          | 12                  | 11 (2.44%)         | 4          | 4 (0.89%)           | 0.2953[1] 0.1502[2]        |
| Irritability †                  | 6                    | 6 (1.33%)           | 3             | 3 (2.00%)          | 0             | 0 (0.00%)          | 3                   | 3 (2.00%)          | 8          | 8 (5.33%)           | 0.0095[3] 0.0174[4]        |
| Nausea                          | 14                   | 14 (1.04%)          | 4             | 4 (0.89%)          | 4             | 4 (0.89%)          | 6                   | 6 (1.33%)          | 6          | 5 (1.11%)           | 1.0000[3] 0.9567[4]        |
| Vomiting                        | 33                   | 31 (2.30%)          | 13            | 12 (2.67%)         | 8             | 7 (1.56%)          | 12                  | 12 (2.67%)         | 11         | 10 (2.22%)          | 0.9273[1] 0.6431[2]        |
| Arthralgia                      | 9                    | 9 (0.67%)           | 4             | 4 (0.89%)          | 3             | 3 (0.67%)          | 2                   | 2 (0.44%)          | 1          | 1 (0.22%)           | 0.4669[3] 0.7179[4]        |
| Diarrhea                        | 37                   | 35 (2.59%)          | 14            | 14 (3.11%)         | 6             | 6 (1.33%)          | 17                  | 15 (3.33%)         | 10         | 10 (2.22%)          | 0.6630[1] 0.2013[2]        |
| Drowsiness                      | 13                   | 11 (0.81%)          | 6             | 5 (1.11%)          | 2             | 2 (0.44%)          | 5                   | 4 (0.89%)          | 4          | 4 (0.89%)           | 1.0000[3] 0.7983[4]        |
| Loss of appetite                | 10                   | 10 (0.74%)          | 2             | 2 (0.44%)          | 4             | 4 (0.89%)          | 4                   | 4 (0.89%)          | 4          | 4 (0.89%)           | 0.7590[3] 0.8545[4]        |
| Chills                          | 4                    | 4 (0.30%)           | 1             | 1 (0.22%)          | 2             | 2 (0.44%)          | 1                   | 1 (0.22%)          | 3          | 3 (0.67%)           | 0.3763[3] 0.8454[4]        |
| Persistent crying †             | 6                    | 6 (1.33%)           | 0             | 0 (0.00%)          | 1             | 1 (0.67%)          | 5                   | 5 (3.33%)          | 2          | 2 (1.33%)           | 1.0000[3] 0.0918[4]        |
| Rash*                           | 0                    | 0 (0.00%)           | 0             | 0 (0.00%)          | 0             | 0 (0.00%)          | 0                   | 0 (0.00%)          | 0          | 0 (0.00%)           | NA                         |
| Nasopharyngitis*                | 4                    | 4 (5.13%)           | 1             | 1 (4.17%)          | 2             | 2 (7.14%)          | 1                   | 1 (3.85%)          | 4          | 4 (13.33%)          | 0.2140[3] 0.5888[4]        |

[Note] N: number of total participants; n: number of participants who reported events; m: number of events; %: percentages (100\*n/N). NA: Not Applicable.

\* Only for MR vaccine recipients among the 9-15 months old (Total (N=108) and each Lot 1 (N=29), Lot 2 (N=28), Lot 3 (N=27), and Control (N=24)).

† Only for Age Strata 2 and 3 those who are 2 years old and above (Total (N=900) and each Lot 1 (N=300), Lot 2 (N=300), Lot 3 (N=300), and Control (N=300))

‡ Only for Age Strata 1 those who are less than 2 years (Total (N=600) and each Lot 1 (N=150), Lot 2 (N=150), Lot 3 (N=150), and Control (N=150))  
The p-value was derived from [1] Chi-square test or [3] Fisher's exact test compared between Vi-DT (Pooled Lot1+Lot2\_Lot3) and Vi-TT.  
The p-value was derived from [2] Chi-square test or [4] Fisher's exact test compared among Vi-DT Lot1, Lot2, Lot3, and Vi-TT.

**Supplementary Table S18:** Distribution of unsolicited AEs within 4 weeks after vaccination

| SOC\PT                                               | Vi-DT Group<br>(N=1350) |                         |               |                    |               |                    | Vi-TT Group<br>(N=450) |                    |            |                    | P-value                    |
|------------------------------------------------------|-------------------------|-------------------------|---------------|--------------------|---------------|--------------------|------------------------|--------------------|------------|--------------------|----------------------------|
|                                                      |                         |                         | Lot 1 (N=450) |                    | Lot 2 (N=450) |                    | Lot 3 (N=450)          |                    |            |                    |                            |
| Within 4 weeks after the dose                        | m                       | n (%)                   | m             | n (%)              | m             | n (%)              | m                      | n (%)              | m          | n (%)              |                            |
| <b>All ages</b>                                      | <b>361</b>              | <b>208<br/>(15.41%)</b> | <b>110</b>    | <b>63 (14.00%)</b> | <b>135</b>    | <b>74 (16.44%)</b> | <b>116</b>             | <b>71 (15.78%)</b> | <b>143</b> | <b>76 (16.89%)</b> | <b>0.4553[1] 0.6506[2]</b> |
| Ear and labyrinth disorders                          | 3                       | 3 (0.22%)               | 2             | 2 (0.44%)          | 0             | 0 (0.00%)          | 1                      | 1 (0.22%)          | 1          | 1 (0.22%)          | 1.0000[3] 0.9059[4]        |
| Ear pain                                             | 2                       | 2 (0.15%)               | 1             | 1 (0.22%)          | 0             | 0 (0.00%)          | 1                      | 1 (0.22%)          | 1          | 1 (0.22%)          | 1.0000[3] 1.0000[4]        |
| Ear pruritus                                         | 1                       | 1 (0.07%)               | 1             | 1 (0.22%)          | 0             | 0 (0.00%)          | 0                      | 0 (0.00%)          | 0          | 0 (0.00%)          | 1.0000[3] 1.0000[4]        |
| Eye disorders                                        | 2                       | 2 (0.15%)               | 2             | 2 (0.44%)          | 0             | 0 (0.00%)          | 0                      | 0 (0.00%)          | 0          | 0 (0.00%)          | 1.0000[3] 0.2496[4]        |
| Eye discharge                                        | 1                       | 1 (0.07%)               | 1             | 1 (0.22%)          | 0             | 0 (0.00%)          | 0                      | 0 (0.00%)          | 0          | 0 (0.00%)          | 1.0000[3] 1.0000[4]        |
| Eye pain                                             | 1                       | 1 (0.07%)               | 1             | 1 (0.22%)          | 0             | 0 (0.00%)          | 0                      | 0 (0.00%)          | 0          | 0 (0.00%)          | 1.0000[3] 1.0000[4]        |
| Gastrointestinal disorders                           | 54                      | 44 (3.26%)              | 16            | 13 (2.89%)         | 23            | 18 (4.00%)         | 15                     | 13 (2.89%)         | 19         | 11 (2.44%)         | 0.3844[1] 0.5710[2]        |
| Abdominal distension                                 | 1                       | 1 (0.07%)               | 0             | 0 (0.00%)          | 0             | 0 (0.00%)          | 1                      | 1 (0.22%)          | 0          | 0 (0.00%)          | 1.0000[3] 1.0000[4]        |
| Abdominal pain                                       | 7                       | 7 (0.52%)               | 2             | 2 (0.44%)          | 5             | 5 (1.11%)          | 0                      | 0 (0.00%)          | 0          | 0 (0.00%)          | 0.1259[1] 0.0204[4]        |
| Abdominal pain upper                                 | 1                       | 1 (0.07%)               | 0             | 0 (0.00%)          | 0             | 0 (0.00%)          | 1                      | 1 (0.22%)          | 0          | 0 (0.00%)          | 1.0000[3] 1.0000[4]        |
| Constipation                                         | 2                       | 2 (0.15%)               | 1             | 1 (0.22%)          | 1             | 1 (0.22%)          | 0                      | 0 (0.00%)          | 0          | 0 (0.00%)          | 1.0000[3] 1.0000[4]        |
| Diarrhoea                                            | 21                      | 21 (1.56%)              | 5             | 5 (1.11%)          | 8             | 8 (1.78%)          | 8                      | 8 (1.78%)          | 8          | 8 (1.78%)          | 0.7457[1] 0.8142[2]        |
| Diarrhoea haemorrhagic                               | 1                       | 1 (0.07%)               | 1             | 1 (0.22%)          | 0             | 0 (0.00%)          | 0                      | 0 (0.00%)          | 0          | 0 (0.00%)          | 1.0000[3] 1.0000[4]        |
| Gastritis                                            | 1                       | 1 (0.07%)               | 0             | 0 (0.00%)          | 0             | 0 (0.00%)          | 1                      | 1 (0.22%)          | 0          | 0 (0.00%)          | 1.0000[3] 1.0000[4]        |
| Gingival swelling                                    | 0                       | 0 (0.00%)               | 0             | 0 (0.00%)          | 0             | 0 (0.00%)          | 0                      | 0 (0.00%)          | 1          | 1 (0.22%)          | 0.2500[3] 1.0000[4]        |
| Mouth ulceration                                     | 1                       | 1 (0.07%)               | 1             | 1 (0.22%)          | 0             | 0 (0.00%)          | 0                      | 0 (0.00%)          | 1          | 1 (0.22%)          | 0.4376[3] 1.0000[4]        |
| Nausea                                               | 1                       | 1 (0.07%)               | 0             | 0 (0.00%)          | 1             | 1 (0.22%)          | 0                      | 0 (0.00%)          | 0          | 0 (0.00%)          | 1.0000[3] 1.0000[4]        |
| Vomiting                                             | 17                      | 17 (1.26%)              | 6             | 6 (1.33%)          | 8             | 8 (1.78%)          | 3                      | 3 (0.67%)          | 9          | 8 (1.78%)          | 0.4157[1] 0.4372[2]        |
| Dental discomfort                                    | 1                       | 1 (0.07%)               | 0             | 0 (0.00%)          | 0             | 0 (0.00%)          | 1                      | 1 (0.22%)          | 0          | 0 (0.00%)          | 1.0000[3] 1.0000[4]        |
| General disorders and administration site conditions | 64                      | 62 (4.59%)              | 21            | 19 (4.22%)         | 24            | 24 (5.33%)         | 19                     | 19 (4.22%)         | 25         | 24 (5.33%)         | 0.5235[1] 0.7479[2]        |
| Asthenia                                             | 1                       | 1 (0.07%)               | 1             | 1 (0.22%)          | 0             | 0 (0.00%)          | 0                      | 0 (0.00%)          | 0          | 0 (0.00%)          | 1.0000[3] 1.0000[4]        |
| Chest pain                                           | 1                       | 1 (0.07%)               | 0             | 0 (0.00%)          | 0             | 0 (0.00%)          | 1                      | 1 (0.22%)          | 0          | 0 (0.00%)          | 1.0000[3] 1.0000[4]        |
| Pyrexia                                              | 60                      | 60 (4.44%)              | 19            | 19 (4.22%)         | 24            | 24 (5.33%)         | 17                     | 17 (3.78%)         | 25         | 24 (5.33%)         | 0.4388[1] 0.5938[2]        |
| Swelling face                                        | 1                       | 1 (0.07%)               | 1             | 1 (0.22%)          | 0             | 0 (0.00%)          | 0                      | 0 (0.00%)          | 0          | 0 (0.00%)          | 1.0000[3] 1.0000[4]        |
| Peripheral swelling                                  | 1                       | 1 (0.07%)               | 0             | 0 (0.00%)          | 0             | 0 (0.00%)          | 1                      | 1 (0.22%)          | 0          | 0 (0.00%)          | 1.0000[3] 1.0000[4]        |
| Hepatobiliary disorders                              | 0                       | 0 (0.00%)               | 0             | 0 (0.00%)          | 0             | 0 (0.00%)          | 0                      | 0 (0.00%)          | 1          | 1 (0.22%)          | 0.2500[3] 1.0000[4]        |
| Jaundice                                             | 0                       | 0 (0.00%)               | 0             | 0 (0.00%)          | 0             | 0 (0.00%)          | 0                      | 0 (0.00%)          | 1          | 1 (0.22%)          | 0.2500[3] 1.0000[4]        |
| Infections and infestations                          | 76                      | 73 (5.41%)              | 20            | 19 (4.22%)         | 26            | 24 (5.33%)         | 30                     | 30 (6.67%)         | 34         | 32 (7.11%)         | 0.1817[1] 0.2369[2]        |
| Bronchiolitis                                        | 0                       | 0 (0.00%)               | 0             | 0 (0.00%)          | 0             | 0 (0.00%)          | 0                      | 0 (0.00%)          | 1          | 1 (0.22%)          | 0.2500[3] 1.0000[4]        |

|                                                 |    |            |    |            |    |            |    |            |    |            |           |           |
|-------------------------------------------------|----|------------|----|------------|----|------------|----|------------|----|------------|-----------|-----------|
| Conjunctivitis                                  | 3  | 3 (0.22%)  | 0  | 0 (0.00%)  | 2  | 2 (0.44%)  | 1  | 1 (0.22%)  | 0  | 0 (0.00%)  | 0.5777[3] | 0.6244[4] |
| Gastroenteritis                                 | 2  | 2 (0.15%)  | 0  | 0 (0.00%)  | 1  | 1 (0.22%)  | 1  | 1 (0.22%)  | 1  | 1 (0.22%)  | 1.0000[3] | 1.0000[4] |
| Hand-foot-and-mouth disease                     | 1  | 1 (0.07%)  | 0  | 0 (0.00%)  | 0  | 0 (0.00%)  | 1  | 1 (0.22%)  | 0  | 0 (0.00%)  | 1.0000[3] | 1.0000[4] |
| Lower respiratory tract infection               | 1  | 1 (0.07%)  | 0  | 0 (0.00%)  | 0  | 0 (0.00%)  | 1  | 1 (0.22%)  | 1  | 1 (0.22%)  | 0.4376[3] | 1.0000[4] |
| Mumps                                           | 1  | 1 (0.07%)  | 1  | 1 (0.22%)  | 0  | 0 (0.00%)  | 0  | 0 (0.00%)  | 0  | 0 (0.00%)  | 1.0000[3] | 1.0000[4] |
| Nasopharyngitis                                 | 45 | 45 (3.33%) | 12 | 12 (2.67%) | 17 | 17 (3.78%) | 16 | 16 (3.56%) | 21 | 20 (4.44%) | 0.2739[1] | 0.5538[2] |
| Otitis media chronic                            | 1  | 1 (0.07%)  | 1  | 1 (0.22%)  | 0  | 0 (0.00%)  | 0  | 0 (0.00%)  | 0  | 0 (0.00%)  | 1.0000[3] | 1.0000[4] |
| Pharyngitis                                     | 0  | 0 (0.00%)  | 0  | 0 (0.00%)  | 0  | 0 (0.00%)  | 0  | 0 (0.00%)  | 2  | 2 (0.44%)  | 0.0624[3] | 0.2496[4] |
| Pneumonia                                       | 1  | 1 (0.07%)  | 0  | 0 (0.00%)  | 1  | 1 (0.22%)  | 0  | 0 (0.00%)  | 0  | 0 (0.00%)  | 1.0000[3] | 1.0000[4] |
| Rhinitis                                        | 1  | 1 (0.07%)  | 0  | 0 (0.00%)  | 0  | 0 (0.00%)  | 1  | 1 (0.22%)  | 1  | 1 (0.22%)  | 0.4376[3] | 1.0000[4] |
| Subcutaneous abscess                            | 0  | 0 (0.00%)  | 0  | 0 (0.00%)  | 0  | 0 (0.00%)  | 0  | 0 (0.00%)  | 1  | 1 (0.22%)  | 0.2500[3] | 1.0000[4] |
| Tonsillitis                                     | 1  | 1 (0.07%)  | 1  | 1 (0.22%)  | 0  | 0 (0.00%)  | 0  | 0 (0.00%)  | 0  | 0 (0.00%)  | 1.0000[3] | 1.0000[4] |
| Upper respiratory tract infection               | 13 | 13 (0.96%) | 4  | 4 (0.89%)  | 3  | 3 (0.67%)  | 6  | 6 (1.33%)  | 4  | 4 (0.89%)  | 1.0000[3] | 0.8282[4] |
| Urinary tract infection                         | 0  | 0 (0.00%)  | 0  | 0 (0.00%)  | 0  | 0 (0.00%)  | 0  | 0 (0.00%)  | 1  | 1 (0.22%)  | 0.2500[3] | 1.0000[4] |
| Viral rash                                      | 1  | 1 (0.07%)  | 0  | 0 (0.00%)  | 1  | 1 (0.22%)  | 0  | 0 (0.00%)  | 0  | 0 (0.00%)  | 1.0000[3] | 1.0000[4] |
| Tinea infection                                 | 1  | 1 (0.07%)  | 0  | 0 (0.00%)  | 0  | 0 (0.00%)  | 1  | 1 (0.22%)  | 0  | 0 (0.00%)  | 1.0000[3] | 1.0000[4] |
| Respiratory tract infection                     | 2  | 2 (0.15%)  | 0  | 0 (0.00%)  | 1  | 1 (0.22%)  | 1  | 1 (0.22%)  | 0  | 0 (0.00%)  | 1.0000[3] | 1.0000[4] |
| Acarodermatitis                                 | 2  | 2 (0.15%)  | 1  | 1 (0.22%)  | 0  | 0 (0.00%)  | 1  | 1 (0.22%)  | 1  | 1 (0.22%)  | 1.0000[3] | 1.0000[4] |
| Injury, poisoning and procedural complications  | 3  | 3 (0.22%)  | 1  | 1 (0.22%)  | 2  | 2 (0.44%)  | 0  | 0 (0.00%)  | 2  | 2 (0.44%)  | 0.6041[3] | 0.7648[4] |
| Thermal burn                                    | 1  | 1 (0.07%)  | 1  | 1 (0.22%)  | 0  | 0 (0.00%)  | 0  | 0 (0.00%)  | 1  | 1 (0.22%)  | 0.4376[3] | 1.0000[4] |
| Tongue injury                                   | 1  | 1 (0.07%)  | 0  | 0 (0.00%)  | 1  | 1 (0.22%)  | 0  | 0 (0.00%)  | 0  | 0 (0.00%)  | 1.0000[3] | 1.0000[4] |
| Limb injury                                     | 1  | 1 (0.07%)  | 0  | 0 (0.00%)  | 1  | 1 (0.22%)  | 0  | 0 (0.00%)  | 0  | 0 (0.00%)  | 1.0000[3] | 1.0000[4] |
| Procedural pain                                 | 0  | 0 (0.00%)  | 0  | 0 (0.00%)  | 0  | 0 (0.00%)  | 0  | 0 (0.00%)  | 1  | 1 (0.22%)  | 0.2500[3] | 1.0000[4] |
| Metabolism and nutrition disorders              | 1  | 1 (0.07%)  | 1  | 1 (0.22%)  | 0  | 0 (0.00%)  | 0  | 0 (0.00%)  | 0  | 0 (0.00%)  | 1.0000[3] | 1.0000[4] |
| Vitamin D deficiency                            | 1  | 1 (0.07%)  | 1  | 1 (0.22%)  | 0  | 0 (0.00%)  | 0  | 0 (0.00%)  | 0  | 0 (0.00%)  | 1.0000[3] | 1.0000[4] |
| Musculoskeletal and connective tissue disorders | 3  | 3 (0.22%)  | 2  | 2 (0.44%)  | 0  | 0 (0.00%)  | 1  | 1 (0.22%)  | 1  | 1 (0.22%)  | 1.0000[3] | 0.9059[4] |
| Back pain                                       | 2  | 2 (0.15%)  | 1  | 1 (0.22%)  | 0  | 0 (0.00%)  | 1  | 1 (0.22%)  | 0  | 0 (0.00%)  | 1.0000[3] | 1.0000[4] |
| Pain in extremity                               | 1  | 1 (0.07%)  | 1  | 1 (0.22%)  | 0  | 0 (0.00%)  | 0  | 0 (0.00%)  | 1  | 1 (0.22%)  | 0.4376[3] | 1.0000[4] |
| Nervous system disorders                        | 9  | 8 (0.59%)  | 3  | 2 (0.44%)  | 4  | 4 (0.89%)  | 2  | 2 (0.44%)  | 2  | 2 (0.44%)  | 1.0000[3] | 0.8548[4] |
| Dizziness                                       | 2  | 1 (0.07%)  | 2  | 1 (0.22%)  | 0  | 0 (0.00%)  | 0  | 0 (0.00%)  | 0  | 0 (0.00%)  | 1.0000[3] | 1.0000[4] |
| Headache                                        | 5  | 5 (0.37%)  | 1  | 1 (0.22%)  | 2  | 2 (0.44%)  | 2  | 2 (0.44%)  | 2  | 2 (0.44%)  | 1.0000[3] | 1.0000[4] |
| Lethargy                                        | 1  | 1 (0.07%)  | 0  | 0 (0.00%)  | 1  | 1 (0.22%)  | 0  | 0 (0.00%)  | 0  | 0 (0.00%)  | 1.0000[3] | 1.0000[4] |
| Seizure                                         | 1  | 1 (0.07%)  | 0  | 0 (0.00%)  | 1  | 1 (0.22%)  | 0  | 0 (0.00%)  | 0  | 0 (0.00%)  | 1.0000[3] | 1.0000[4] |
| Psychiatric disorders                           | 0  | 0 (0.00%)  | 0  | 0 (0.00%)  | 0  | 0 (0.00%)  | 0  | 0 (0.00%)  | 1  | 1 (0.22%)  | 0.2500[3] | 1.0000[4] |
| Breath holding                                  | 0  | 0 (0.00%)  | 0  | 0 (0.00%)  | 0  | 0 (0.00%)  | 0  | 0 (0.00%)  | 1  | 1 (0.22%)  | 0.2500[3] | 1.0000[4] |

|                                                 |     |             |    |            |    |            |    |            |    |             |           |           |
|-------------------------------------------------|-----|-------------|----|------------|----|------------|----|------------|----|-------------|-----------|-----------|
| Renal and urinary disorders                     | 1   | 1 (0.07%)   | 0  | 0 (0.00%)  | 1  | 1 (0.22%)  | 0  | 0 (0.00%)  | 0  | 0 (0.00%)   | 1.0000[3] | 1.0000[4] |
| Dysuria                                         | 1   | 1 (0.07%)   | 0  | 0 (0.00%)  | 1  | 1 (0.22%)  | 0  | 0 (0.00%)  | 0  | 0 (0.00%)   | 1.0000[3] | 1.0000[4] |
| Reproductive system and breast disorders        | 2   | 2 (0.15%)   | 1  | 1 (0.22%)  | 1  | 1 (0.22%)  | 0  | 0 (0.00%)  | 0  | 0 (0.00%)   | 1.0000[3] | 1.0000[4] |
| Dysmenorrhoea                                   | 2   | 2 (0.15%)   | 1  | 1 (0.22%)  | 1  | 1 (0.22%)  | 0  | 0 (0.00%)  | 0  | 0 (0.00%)   | 1.0000[3] | 1.0000[4] |
| Respiratory, thoracic and mediastinal disorders | 128 | 112 (8.30%) | 38 | 31 (6.89%) | 48 | 42 (9.33%) | 42 | 39 (8.67%) | 53 | 47 (10.44%) | 0.1643[1] | 0.2935[2] |
| Cough                                           | 109 | 106 (7.85%) | 32 | 31 (6.89%) | 41 | 39 (8.67%) | 36 | 36 (8.00%) | 48 | 45 (10.00%) | 0.1546[1] | 0.3961[2] |
| Nasal congestion                                | 1   | 1 (0.07%)   | 1  | 1 (0.22%)  | 0  | 0 (0.00%)  | 0  | 0 (0.00%)  | 0  | 0 (0.00%)   | 1.0000[3] | 1.0000[4] |
| Respiratory disorder                            | 1   | 1 (0.07%)   | 0  | 0 (0.00%)  | 0  | 0 (0.00%)  | 1  | 1 (0.22%)  | 0  | 0 (0.00%)   | 1.0000[3] | 1.0000[4] |
| Rhinorrhoea                                     | 12  | 12 (0.89%)  | 4  | 4 (0.89%)  | 5  | 5 (1.11%)  | 3  | 3 (0.67%)  | 3  | 3 (0.67%)   | 0.7738[3] | 0.9406[4] |
| Throat irritation                               | 0   | 0 (0.00%)   | 0  | 0 (0.00%)  | 0  | 0 (0.00%)  | 0  | 0 (0.00%)  | 1  | 1 (0.22%)   | 0.2500[3] | 1.0000[4] |
| Allergic cough                                  | 1   | 1 (0.07%)   | 0  | 0 (0.00%)  | 0  | 0 (0.00%)  | 1  | 1 (0.22%)  | 0  | 0 (0.00%)   | 1.0000[3] | 1.0000[4] |
| Oropharyngeal pain                              | 3   | 3 (0.22%)   | 0  | 0 (0.00%)  | 2  | 2 (0.44%)  | 1  | 1 (0.22%)  | 1  | 1 (0.22%)   | 1.0000[3] | 0.9059[4] |
| Sinonasal obstruction                           | 1   | 1 (0.07%)   | 1  | 1 (0.22%)  | 0  | 0 (0.00%)  | 0  | 0 (0.00%)  | 0  | 0 (0.00%)   | 1.0000[3] | 1.0000[4] |
| Skin and subcutaneous tissue disorders          | 15  | 15 (1.11%)  | 3  | 3 (0.67%)  | 6  | 6 (1.33%)  | 6  | 6 (1.33%)  | 4  | 4 (0.89%)   | 0.7966[3] | 0.7367[4] |
| Dermatitis allergic                             | 1   | 1 (0.07%)   | 0  | 0 (0.00%)  | 1  | 1 (0.22%)  | 0  | 0 (0.00%)  | 0  | 0 (0.00%)   | 1.0000[3] | 1.0000[4] |
| Dermatitis contact                              | 1   | 1 (0.07%)   | 1  | 1 (0.22%)  | 0  | 0 (0.00%)  | 0  | 0 (0.00%)  | 1  | 1 (0.22%)   | 0.4376[3] | 1.0000[4] |
| Eczema                                          | 5   | 5 (0.37%)   | 0  | 0 (0.00%)  | 2  | 2 (0.44%)  | 3  | 3 (0.67%)  | 0  | 0 (0.00%)   | 0.3401[3] | 0.1788[4] |
| Panniculitis                                    | 1   | 1 (0.07%)   | 0  | 0 (0.00%)  | 0  | 0 (0.00%)  | 1  | 1 (0.22%)  | 0  | 0 (0.00%)   | 1.0000[3] | 1.0000[4] |
| Pruritus                                        | 1   | 1 (0.07%)   | 0  | 0 (0.00%)  | 0  | 0 (0.00%)  | 1  | 1 (0.22%)  | 0  | 0 (0.00%)   | 1.0000[3] | 1.0000[4] |
| Rash                                            | 4   | 4 (0.30%)   | 1  | 1 (0.22%)  | 2  | 2 (0.44%)  | 1  | 1 (0.22%)  | 3  | 3 (0.67%)   | 0.3763[3] | 0.8454[4] |
| Skin lesion                                     | 1   | 1 (0.07%)   | 0  | 0 (0.00%)  | 1  | 1 (0.22%)  | 0  | 0 (0.00%)  | 0  | 0 (0.00%)   | 1.0000[3] | 1.0000[4] |
| Urticaria papular                               | 1   | 1 (0.07%)   | 1  | 1 (0.22%)  | 0  | 0 (0.00%)  | 0  | 0 (0.00%)  | 0  | 0 (0.00%)   | 1.0000[3] | 1.0000[4] |

[Note] N: number of total participants; n: number of participants who reported events; m: number of events; %: percentages (100\*n/N). NA: Not Applicable.

The p-value was derived from [1] Chi-square test or [3] Fisher's exact test compared between Vi-DT (Pooled Lot1+Lot2\_Lot3) and Vi-TT.

The p-value was derived from [2] Chi-square test or [4] Fisher's exact test compared among Vi-DT Lot1, Lot2, Lot3, and Vi-TT.

**Supplementary Table S15:** Summary of Major Protocol Deviations

|                                                           | Vi-DT Group |            |            |            | Vi-TT Group | Total       |
|-----------------------------------------------------------|-------------|------------|------------|------------|-------------|-------------|
|                                                           |             | Lot 1      | Lot 2      | Lot 3      |             |             |
| Reasons (%)                                               | N=1,350     | N=450      | N=450      | N=450      | N=450       | N=1,800     |
| 2 <sup>nd</sup> dose MR vaccination (over 15-month child) | 1 (0.07)    | 0 (0.00)   | 0 (0.00)   | 1 (0.22)   | 1 (0.22)    | 2 (0.11)    |
| 2 <sup>nd</sup> dose MR vaccination (post vaccination)    | 1 (0.07)    | 0 (0.00)   | 1 (0.22)   | 0 (0.00)   | 0 (0.00)    | 1 (0.06)    |
| Missing Visits (Visit 4)                                  | 4 (0.30)    | 3 (0.67)   | 0 (0.00)   | 1 (0.22)   | 0 (0.00)    | 4 (0.22)    |
| Rejection of blood collection on Visit 4                  | 1 (0.07)    | 1 (0.22)   | 0 (0.00)   | 0 (0.00)   | 0 (0.00)    | 1 (0.06)    |
| Visit outside window (Visit 4)                            | 13 (0.96)   | 2 (0.44)   | 4 (0.89)   | 7 (1.56)   | 3 (0.67)    | 16 (0.89)   |
| Visit outside window (Onsite on V6)                       | 69 (5.11)   | 20 (4.44)  | 26 (5.78)  | 23 (5.11)  | 19 (4.22)   | 88 (4.89)   |
| Visit outside window (Telephonic on V6)                   | 92 (6.81)   | 35 (7.78)  | 28 (6.22)  | 29 (6.44)  | 36 (8.00)   | 128 (7.11)  |
| Total                                                     | 181 (13.41) | 61 (13.56) | 59 (13.11) | 61 (13.56) | 59 (13.11)  | 240 (13.33) |
